# Supplementary material for: SLC1A3 contributes to L‐asparaginase resistance in solid tumors
Source: PubMed Central journal article supplement (PMC6826201; doi:10.15252/embj.2019102147), 2019-09-16
Supplement: EMBJ-38-e102147-s001.pdf [file EMBJ-38-e102147-s001.pdf]

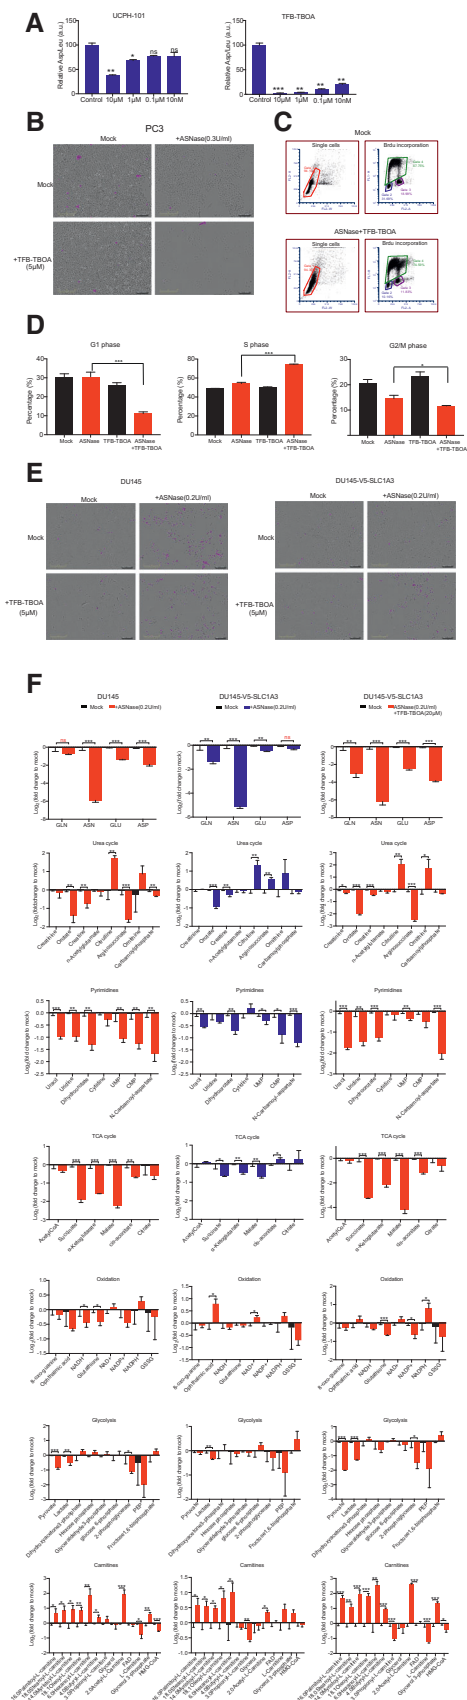

**Figure EV2. Combination of ASNase and SLC1A3 inhibition impairs cancer cell proliferation.**

- A PC3 cells were incubated with two SLC1A3 inhibitors (UCPH-101 and TFB-TBOA) at indicated concentrations and subjected to an aspartate uptake assay ( $n = 2$ ). Leucine uptake level was used for normalization.
- B PC3 cells were treated with ASNase (0.3 U/ml) and TFB-TBOA (5  $\mu$ M) as indicated and images were taken after 4 days. The scale bar indicates 300  $\mu$ m and cells highlighted in pink present apoptotic cells.
- C PC3 cells were treated with mock or combination of ASNase (0.3 U/ml) and TFB-TBOA (5  $\mu$ M) for 9 days and subjected to flow cytometry measurements of cell cycle using BrdU labeling.
- D Flow cytometry cell cycle distribution analysis of PC3 cells under indicated conditions for 9 days by BrdU labeling, ASNase (0.3 U/ml) and TFB-TBOA (5  $\mu$ M).
- E Representative images of apoptosis in DU145 and DU145-V5-SLC1A3 cells treated with ASNase (0.2 U/ml) and TFB-TBOA (5  $\mu$ M) as indicated, and subjected to IncuCyte analysis for apoptotic cells (highlighted in pink). The scale bar indicates 300  $\mu$ m.
- F DU145 and DU145-V5-SLC1A3 cells were treated with ASNase (0.2 U/ml) and TFB-TBOA (20  $\mu$ M) for 3 days as indicated, and collected for metabolome analysis by LC-MS to determine the relative levels of amino acids and metabolites involved in urea cycle, pyrimidine synthesis, TCA cycle, oxidation, glycolysis, and carnitines. GLN, glutamine; ASN, asparagine; GLU, glutamate; ASP, aspartate; TCA cycle, tricarboxylic acid cycle; UMP, uridine monophosphate; CMP, cytidine monophosphate; PEP, phosphoenolpyruvate; NADH, nicotinamide adenine dinucleotide (reduced form); NAD<sup>+</sup>, nicotinamide adenine dinucleotide (oxidized form); NADPH, nicotinamide adenine dinucleotide phosphate (reduced form); NADP<sup>+</sup>, nicotinamide adenine dinucleotide phosphate (oxidized form); GSSG, glutathione disulfide; HMG-CoA, 3-hydroxy-3-methylglutaryl-CoA; FAD, flavin adenine dinucleotide.

Data information: Results were calculated based on three independent replicates, unless otherwise stated, and presented as mean  $\pm$  SD. The  $P$ -value was calculated by two-tailed unpaired  $t$ -test from Prism7. \* $P < 0.05$ , \*\* $P < 0.01$ , \*\*\* $P < 0.001$ .

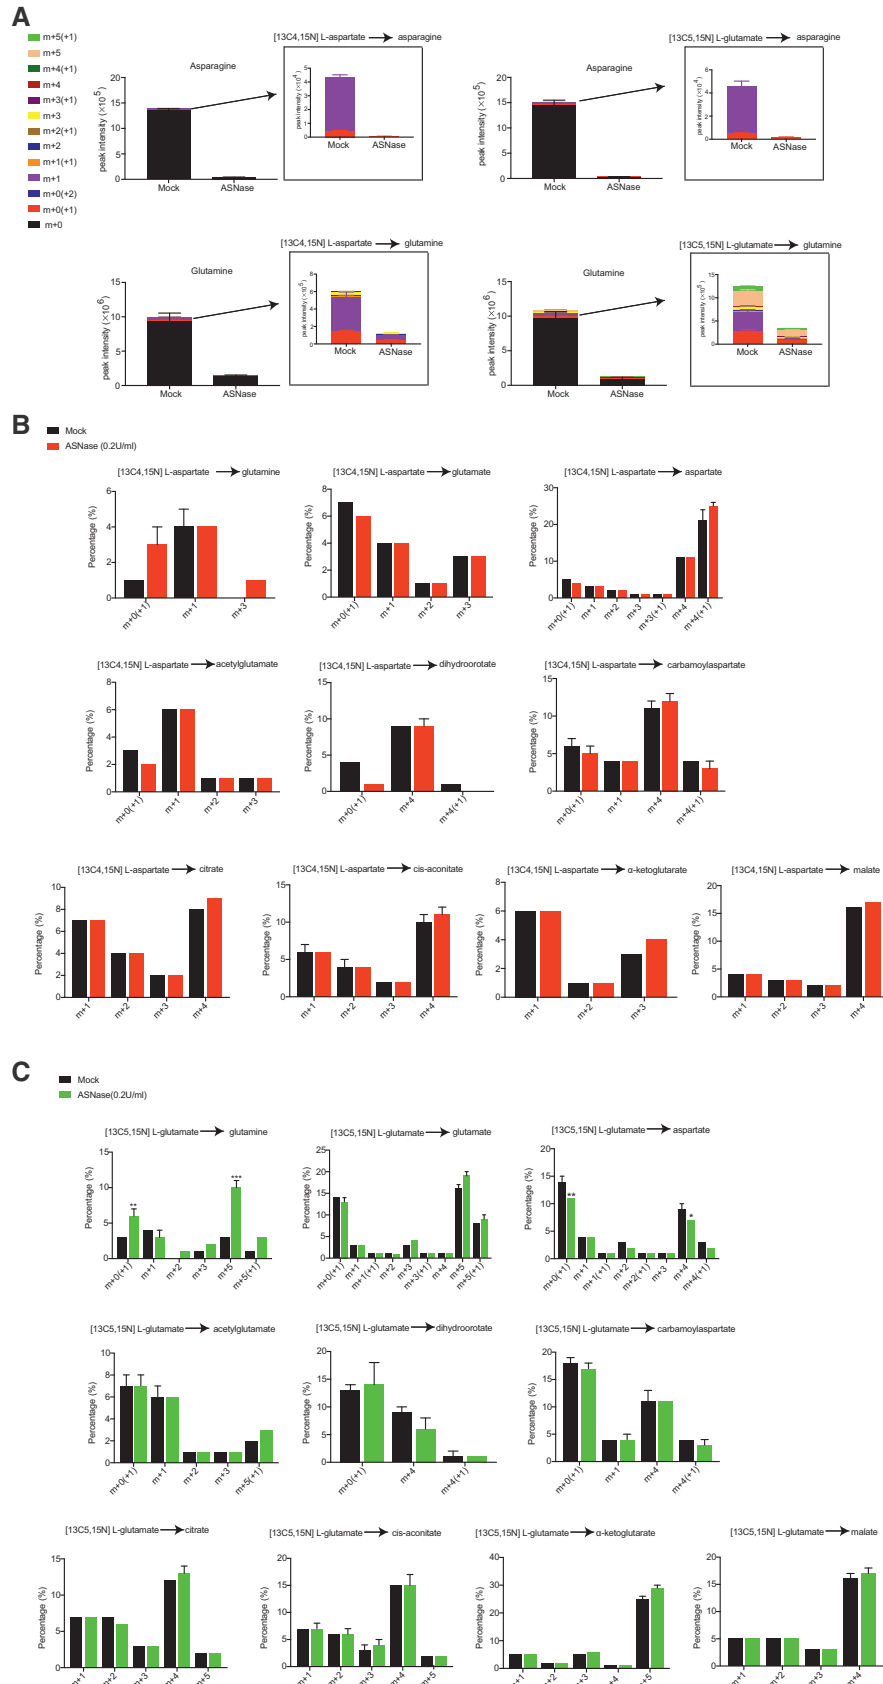

**Figure EV3. Isotopic tracing of aspartate and glutamate in DU145-V5-SLC1A3 cells.**

DU145-V5-SLC1A3 cells were pretreated with ASNase (0.2 U/ml) for 48 h and then supplemented with [<sup>13</sup>C<sub>4</sub>,<sup>15</sup>N] L-aspartate (1.5 mM) and unlabeled glutamate (1.5 mM), or [<sup>13</sup>C<sub>5</sub>,<sup>15</sup>N] L-glutamate (1.5 mM) and unlabeled aspartate (1.5 mM) for 8 h. Subsequently, cells were harvested for LC-MS analysis.

- A Mass isotopologue analysis of <sup>13</sup>C and <sup>15</sup>N incorporation into asparagine and glutamine in DU145-V5-SLC1A3 cells cultured as indicated conditions.
- B Mass isotopologue analysis of <sup>13</sup>C and <sup>15</sup>N incorporation into glutamine, glutamate, and aspartate and metabolites from TCA cycle, urea cycle, and nucleotide synthesis in DU145-V5-SLC1A3 cells cultured with [<sup>13</sup>C<sub>4</sub>,<sup>15</sup>N] L-aspartate and unlabeled glutamate.
- C Mass isotopologue analysis of <sup>13</sup>C and <sup>15</sup>N incorporation into glutamine, glutamate, and aspartate and metabolites from TCA cycle, urea cycle, and nucleotide synthesis in DU145-V5-SLC1A3 cells cultured with [<sup>13</sup>C<sub>5</sub>,<sup>15</sup>N] L-glutamate and unlabeled aspartate.

Data information: Data shown in (B–C) were calculated as labeled fraction divided by total peak area (including unlabeled fraction), and results were presented as mean ± SD (*n* = 3). Number before brackets accounts for <sup>13</sup>C incorporation and number in brackets accounts for <sup>15</sup>N incorporation. The *P*-value was calculated by two-tailed unpaired *t*-test from Prism7. \**P* < 0.05, \*\**P* < 0.01, \*\*\**P* < 0.001.

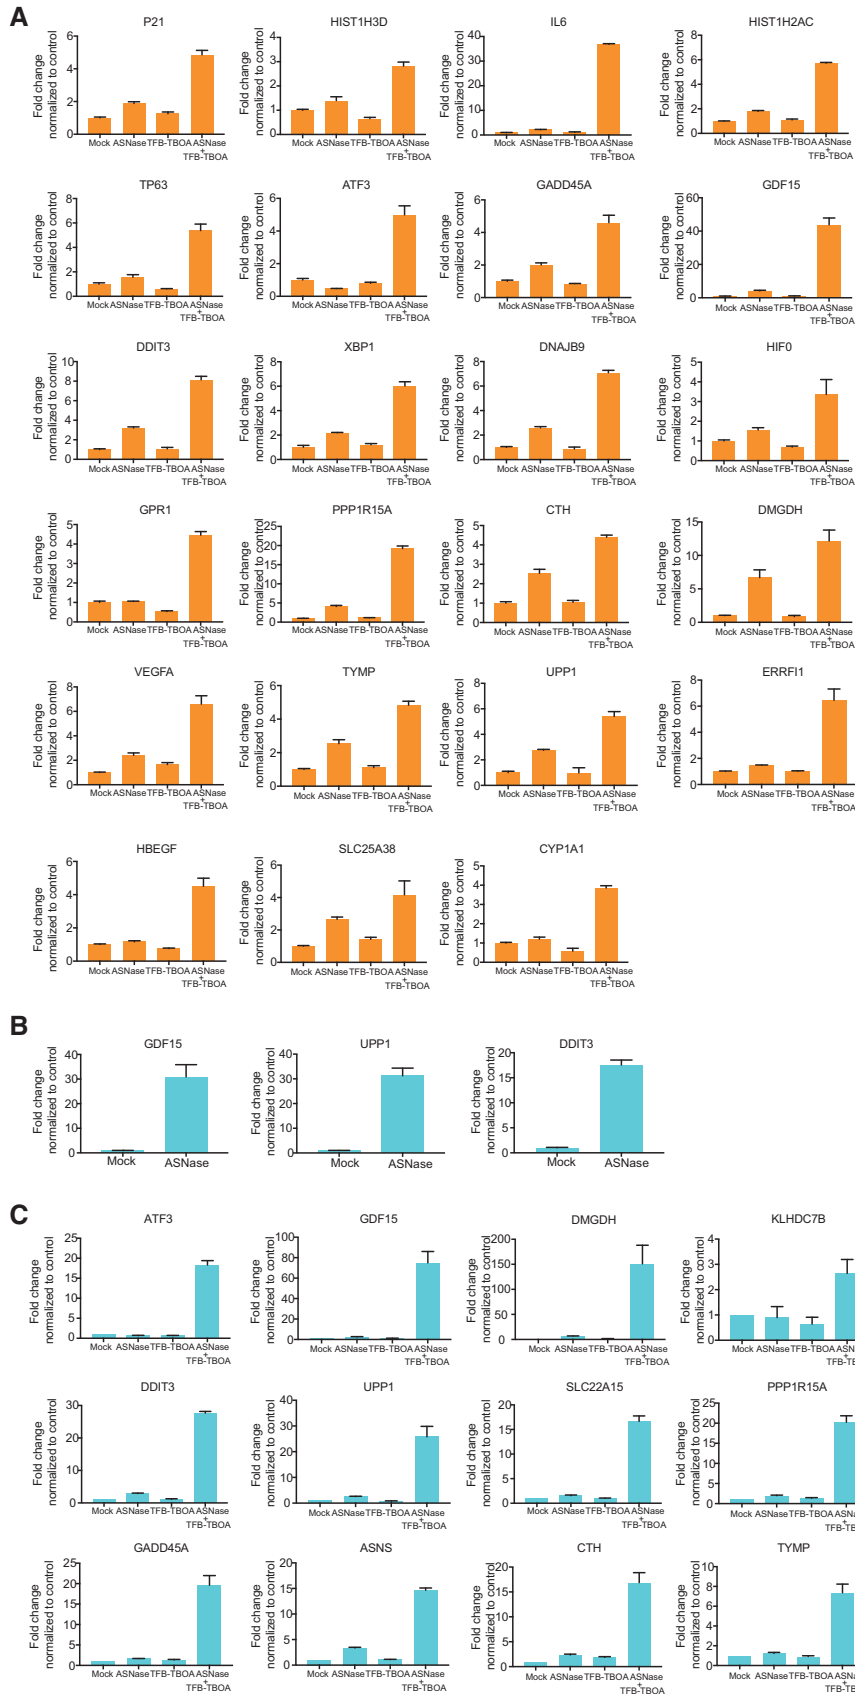

**Figure EV4. RT-qPCR validation of differential expressed genes in PC3, DU145, and DU145-V5-SLC1A3 Cells from Fig 4.**

A–C RT-qPCR validation based on transcriptome analysis in PC3 (A), DU145 (B), and DU145-V5-SLC1A3 cells (C).

Data information: Results were calculated based on three independent replicates, and presented as mean ± SD.

**Figure EV5. SLC1A3 expression promotes ASNase resistance and tumor progression *in vivo*.**

- A Glutamine levels in serum, mammary fat pad tissues, and growing tumors derived from SUM159PT human breast cancer cells with or without ASNase treatment (60 U per day) for consecutive 5 days. Essential amino acids were used for the raw data normalization. Results were presented as mean  $\pm$  SEM ( $n = 3$ ).
- B Left: quantification of aspartate uptake in parental 4T1 and 4T1-V5-SLC1A3 cells ( $n = 2$ ). Leucine uptake was used for normalization. The  $P$ -value was calculated by one-tailed unpaired  $t$ -test in Prism7. Right: IncuCyte cell proliferation curves for parental 4T1 and 4T1-V5-SLC1A3 cells with or without ASNase (0.2 U/ml) for 10 days ( $n = 3$ ).
- C Tumor volumes resulting from orthotopic implantation of parental 4T1 and 4T1-V5-SLC1A3 cells at day 12 ( $n = 13$  mice per group, except for 4T1 + ASNase,  $n = 12$ ). Results were presented as mean  $\pm$  SEM.
- D Days for orthotopically injected parental 4T1 and 4T1-V5-SLC1A3 cells to reach 450–550 mm<sup>3</sup>. Results were presented as mean  $\pm$  SEM ( $n = 13$ ).
- E Following the mastectomy, mice were daily challenged for breathing test and sacrificed due to breathing problems. The survival rate for 4T1- and 4T1-V5-SLC1A3-injected mice was scored in Prism7.
- F Left: quantification of aspartate uptake in MDA-MB-231 and MDA-MB-231-V5-SLC1A3 cells ( $n = 2$ ). Leucine uptake was used for normalization. Right: IncuCyte cell proliferation measurements for MDA-MB-231 and MDA-MB-231-V5-SLC1A3 cells with or without ASNase (1 U/ml) for 8 days ( $n = 3$ ).
- Data information: Results were calculated based on three replicates and presented as mean  $\pm$  SD (unless otherwise stated). The  $P$ -value was calculated by two-tailed unpaired  $t$ -test except for (B) in Prism7. \* $P < 0.05$ , \*\* $P < 0.01$ , \*\*\* $P < 0.001$ .

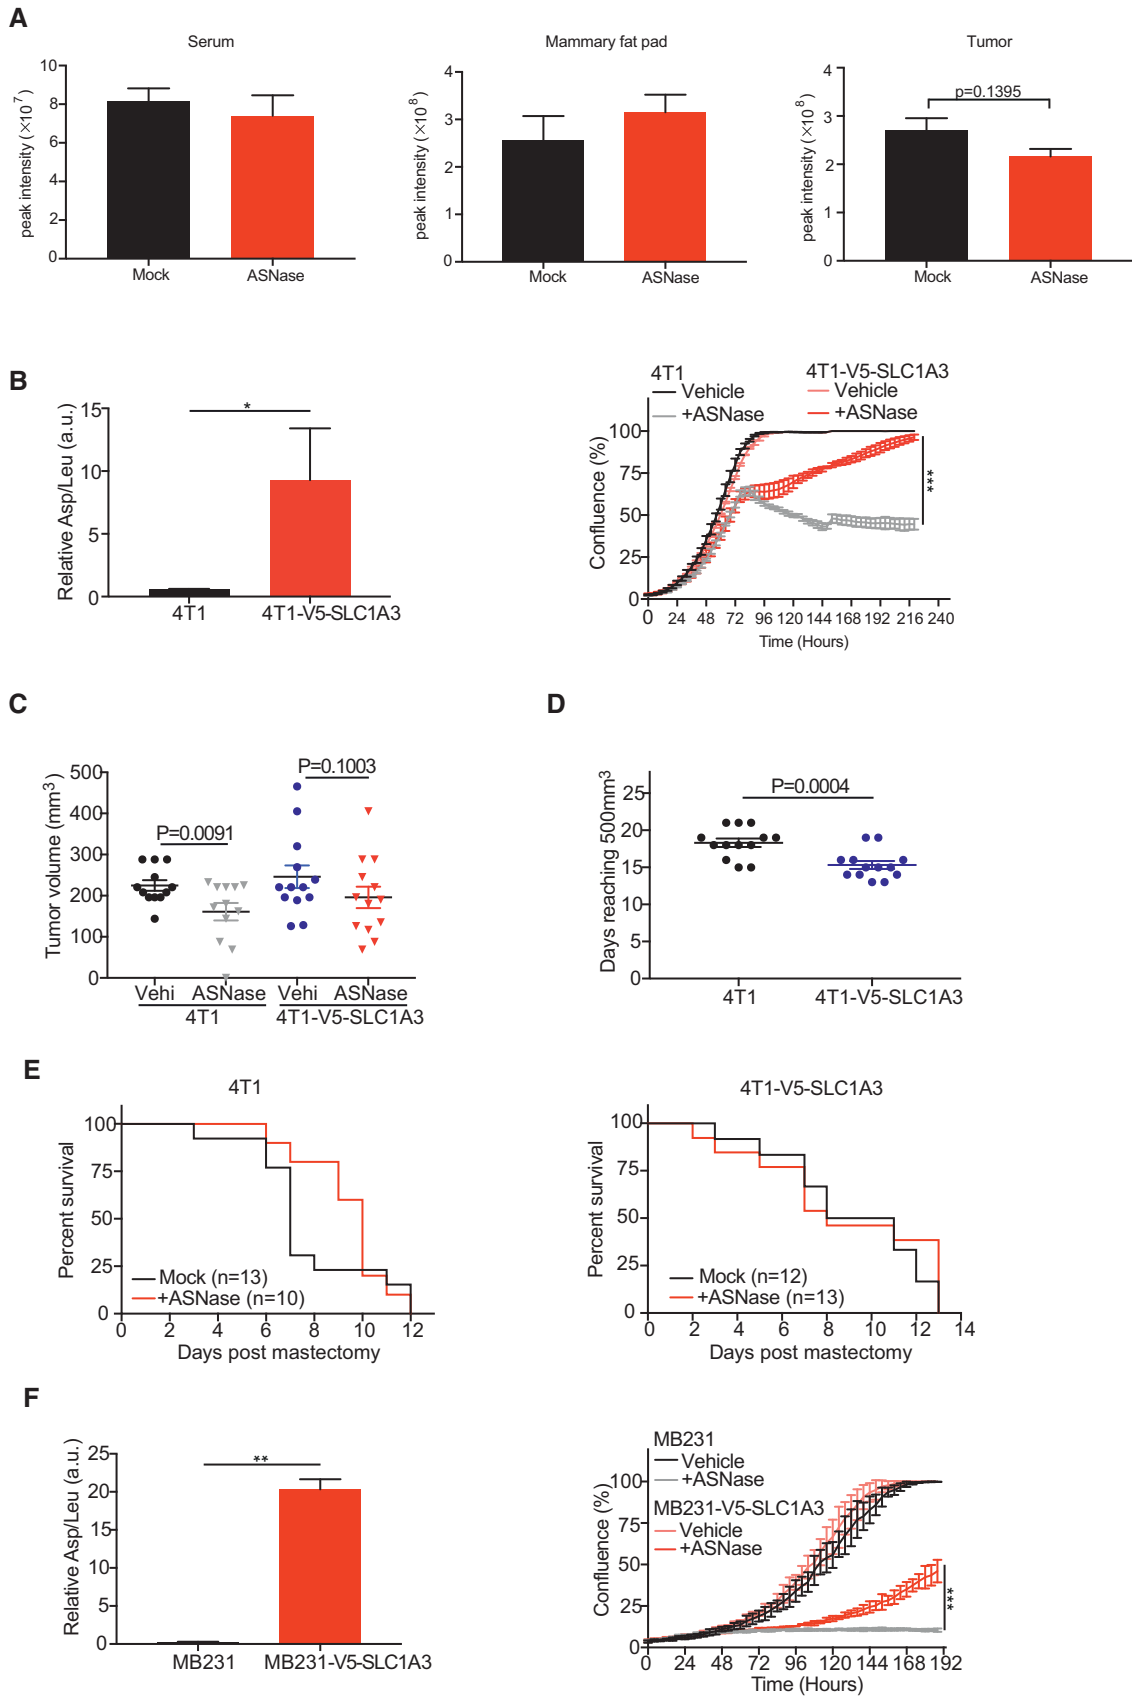

Figure EV5.
